# Supplementary material for: Integrated multi-omics reveal important roles of gut contents in intestinal ischemia–reperfusion induced injuries in rats
Source: PubMed Central journal article supplement (PMC9463172; doi:10.1038/s42003-022-03887-8), 2022-09-09
Supplement: 42003_2022_3887_MOESM2_ESM.pdf [file 42003_2022_3887_MOESM2_ESM.pdf]

## Description of Additional Supplementary Files

**File name:** Supplementary Data 1

**Description:** Significant different metabolites identified in each tissue.

**File name:** Supplementary Data 2

**Description:** Class distribution of metabolites across tissues.

**File name:** Supplementary Data 3

**Description:** Statistics of metabolites in the gut content by a new metabolomic analysis.

**File name:** Supplementary Data 4

**Description:** Differential metabolites in gut content between Sham and IIR0h.

**File name:** Supplementary Data 5

**Description:** Differential metabolites in gut content between IIR0h and IIR6h.

**File name:** Supplementary Data 6

**Description:** Metabolites were classified into groups according to whether their abundances were significantly different between IR6h and Sham.

**File name:** Supplementary Data 7

**Description:** List of the functional bacteria.

**File name:** Supplementary Data 8

**Description:** Differential taxa identified at IR0h compared to Sham by LEfSe.

**File name:** Supplementary Data 9

**Description:** Differential taxa identified at IR6h compared to IR0h by LEfSe.

**File name:** Supplementary Data 10

**Description:** Statistics of the identified genes(KO) during IIR.

**File name:** Supplementary Data 11

**Description:** Identified differential genes(KO) between Sham and IIR0h.

**File name:** Supplementary Data 12

**Description:** Identified differential genes(KO) between IR0h and IR6h.

**File name:** Supplementary Data 13

**Description:** Statistics of the identified pathways during IIR.

**File name:** Supplementary Data 14

**Description:** Identified differential pathways between Sham and IR0h.

**File name:** Supplementary Data 15

**Description:** Identified differential pathways between IR0h and IR6h.

**File name:** Supplementary Data 16

**Description:** Microbial driver species analysis for the functional pathways using a leave-one-out algorithm between Sham and IIR0h.

**File name:** Supplementary Data 17

**Description:** Microbial driver species analysis for the functional pathways using a leave-one-out algorithm between IIR0h and IIR6h.

**File name:** Supplementary Data 18

**Description:** The MRM transitions, retention times, and conditions for quantification of neurotransmitters in gut content.

**File name:** Supplementary Data 19

**Description:** Known functions/characteristics of species obtained based on large numbers of literature retrieval.

**File name:** Supplementary Data 20

**Description:** Abundance of some bowel barrier damage related biomarkers between groups.

**File name:** Supplementary Data 21

**Description:** Pair-wise Spearman correlations as a function of time during IIR.

**File name:** Supplementary Data 22

**Description:** Gut metabolites that were significant altered during IIR and were not returned to normal levels at IIR6h.

**File name:** Supplementary Data 23

**Description:** Immunohistochemical level of several molecular markers for intestinal neuroendocrine system significantly changed during IIR.

**File name:** Supplementary Data 24

**Description:** Overall abundance changes for species with known functions and/or characteristics, including anti-inflammation, pro-inflammation and neurotransmitter producing capacity.
